# Supplementary material
Source: PubMed Central journal article supplement (PMC8154572)
Supplement: jm1c00058_si_001.pdf [file jm1c00058_si_001.pdf]

## Supporting Information

### Direct Observation of Protonation States Modulation in SARS-CoV-2 Main Protease upon Inhibitor Binding with Neutron Crystallography

Daniel W. Kneller,<sup>1,2</sup> Gwyndalyn Phillips,<sup>1,2</sup> Kevin L. Weiss,<sup>1,2</sup> Qiu Zhang,<sup>1,2</sup> Leighton Coates,<sup>1,2,3\*</sup> and Andrey Kovalevsky<sup>1,2\*</sup>

<sup>1</sup>*Neutron Scattering Division, Oak Ridge National Laboratory, 1 Bethel Valley Road, Oak Ridge, TN, 37831, USA*

<sup>2</sup>*National Virtual Biotechnology Laboratory, US Department of Energy*

<sup>3</sup>*Second Target Station, Oak Ridge National Laboratory, 1 Bethel Valley Road, Oak Ridge, TN, 37831, USA*

\*Corresponding Authors: Leighton Coates: [coatesl@ornl.gov](mailto:coatesl@ornl.gov), Andrey Kovalevsky: [kovalevskyay@ornl.gov](mailto:kovalevskyay@ornl.gov)

Table S1.

Figure S1.

Figure S2.

Table S1

| <b>M<sup>Pro</sup>-Telaprevir, RT, PDB ID 7LB7</b>            |                         |                                          |
|---------------------------------------------------------------|-------------------------|------------------------------------------|
| <b>Data collection:</b>                                       | <b>Neutron</b>          | <b>X-ray</b>                             |
| Beamline/Facility                                             | MaNDi (SNS)             | Rigaku HighFlux HomeLab                  |
| Space group                                                   |                         | C2                                       |
| Cell dimensions:                                              |                         |                                          |
| <i>a, b, c</i> (Å)                                            |                         | 110.56, 55.69, 48.81                     |
| $\alpha, \beta, \gamma$ (°)                                   |                         | 90, 101.3, 90                            |
| Resolution (Å)                                                | 14.29-2.40 (2.49-2.40)* | 54.21-2.00 (2.05-2.00)*                  |
| No. reflections measured                                      | 38766                   | 80233                                    |
| No. reflections unique                                        | 9566 (888)              | 19852 (1854)                             |
| <i>R</i> <sub>merge</sub>                                     | 0.176 (0.336)           | 0.082 (0.544)                            |
| <i>R</i> <sub>pim</sub>                                       | 0.085 (0.201)           | 0.046 (0.307)                            |
| <i>CC</i> <sub>1/2</sub>                                      | 0.975 (0.532)           | 0.993 (0.670)                            |
| <i>I</i> / $\sigma$ <i>I</i>                                  | 11.4 (3.1)              | 13.9 (1.9)                               |
| Completeness (%)                                              | 83.4 (77.4)             | 96.3 (93.3)                              |
| Redundancy                                                    | 4.05 (2.68)             | 4.2 (4.0)                                |
| <b>Refinement:</b>                                            |                         |                                          |
| Resolution (neutron, Å)                                       |                         | 14.29 – 2.40                             |
| Resolution (X-ray, Å)                                         |                         | 27.85 – 2.00                             |
| Data rejection criteria                                       |                         | no observation &  F =0                   |
| Sigma cut-off                                                 |                         | 2.5                                      |
| No. reflections (neutron)                                     |                         | 9539                                     |
| No. reflections (X-ray)                                       |                         | 19261                                    |
| <i>R</i> <sub>work</sub> / <i>R</i> <sub>free</sub> (neutron) |                         | 0.216 / 0.228                            |
| <i>R</i> <sub>work</sub> / <i>R</i> <sub>free</sub> (X-ray)   |                         | 0.204 / 0.225                            |
| No. atoms                                                     |                         |                                          |
| Protein, including H and D                                    |                         | 4675                                     |
| Telaprevir                                                    |                         | 107                                      |
| Water                                                         |                         | 285 (i.e. 95 D <sub>2</sub> O molecules) |
| <i>B</i> -factors                                             |                         |                                          |
| Protein                                                       |                         | 39.8                                     |
| Telaprevir                                                    |                         | 33.1                                     |
| Water                                                         |                         | 51.0                                     |
| R.M.S. deviations                                             |                         |                                          |
| Bond lengths (Å)                                              |                         | 0.009                                    |
| Bond angles (°)                                               |                         | 1.094                                    |

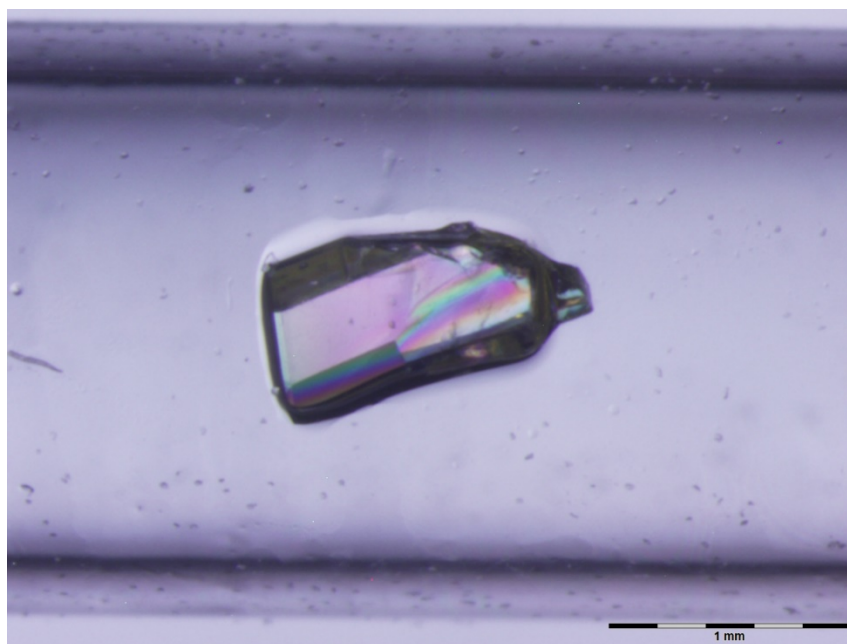

**Figure S1.** The 0.5mm<sup>3</sup> crystal of SARS-CoV-2 M<sup>Pro</sup>-Telaprevir complex used in the current study.

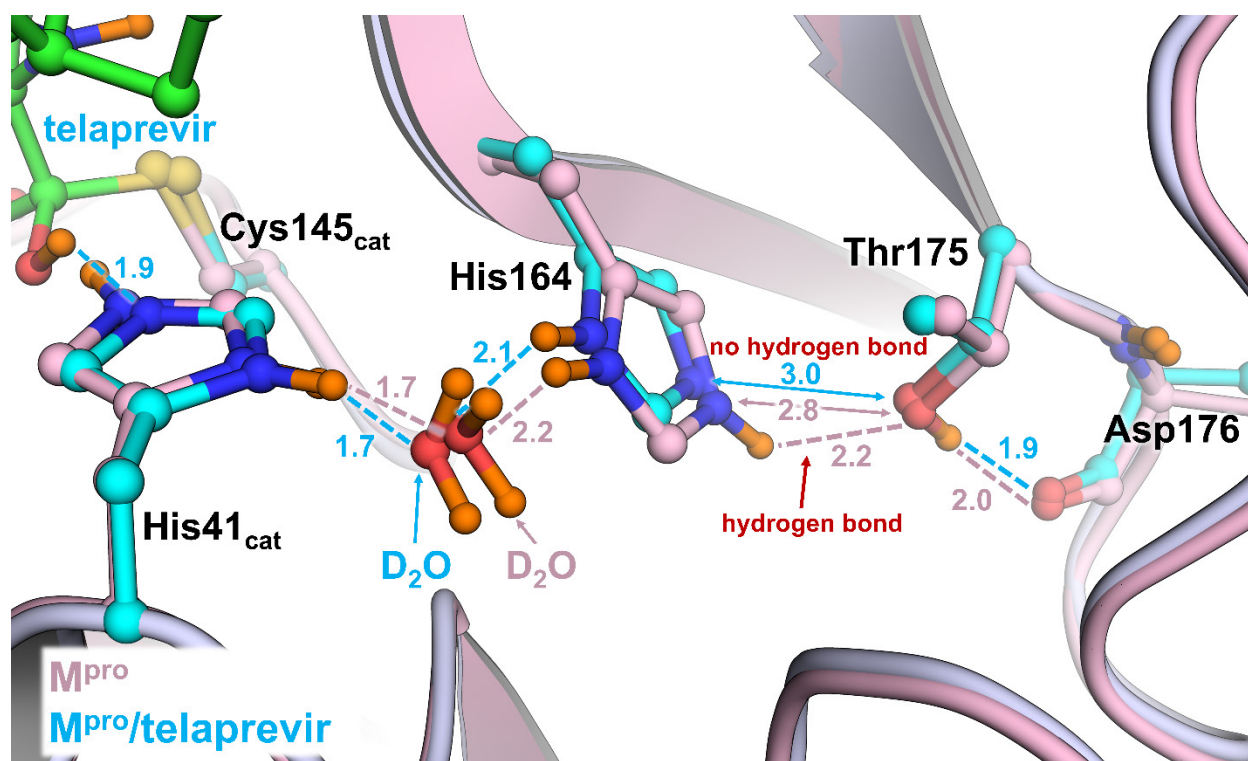

**Figure S2.** Superposition of M<sup>pro</sup>-Telaprevir neutron structure (cyan carbons for protein and green carbons for telaprevir) with the neutron structure of ligand-free M<sup>pro</sup> (PDB ID 7JUN) showing differences in hydrogen bonds made by His41 and His164 due to protonation state changes upon inhibitor binding.

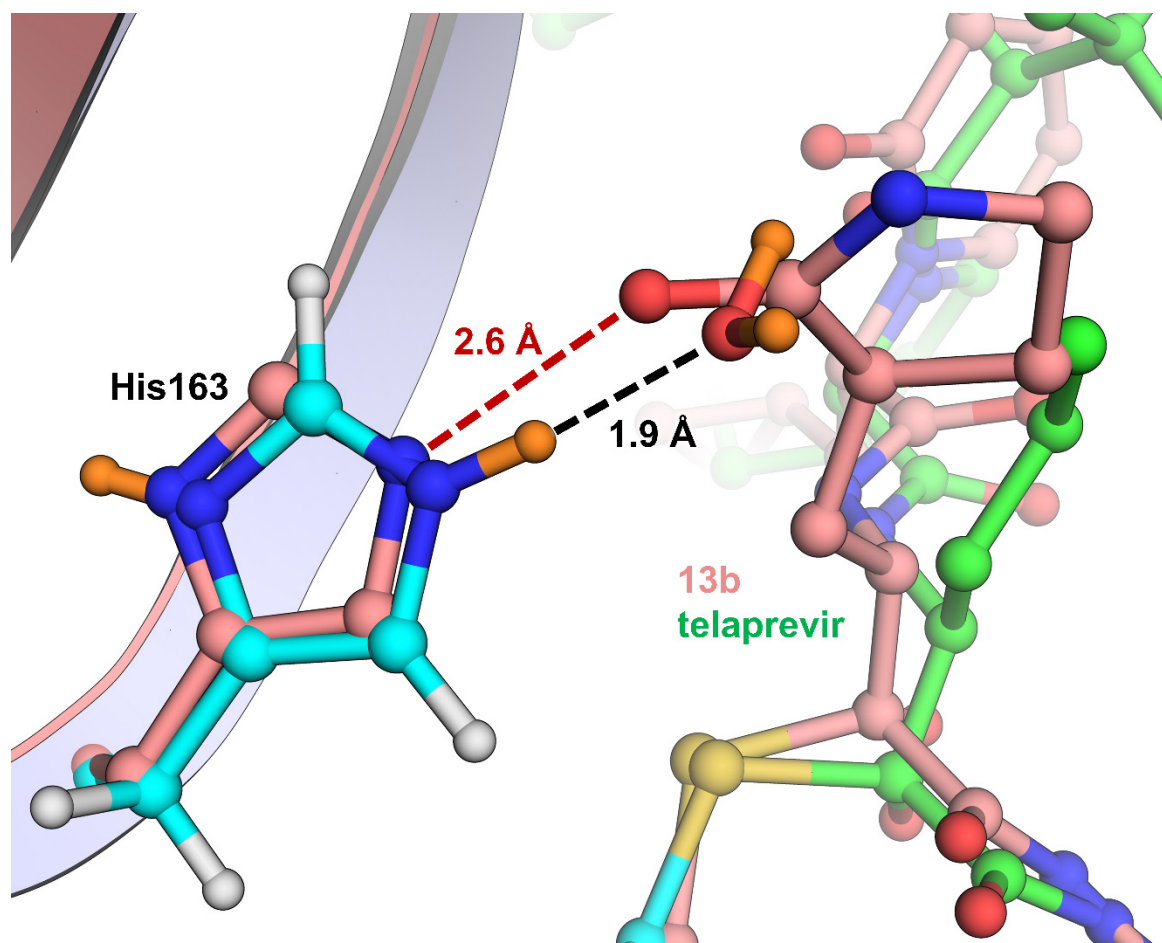

**Figure S3.** Superposition of M<sup>pro</sup>-Telaprevir neutron structure (cyan carbons for protein and green carbons for telaprevir) with the X-ray structure of M<sup>pro</sup> in complex with inhibitor 13b (PDB ID 6Y2F) showing a D<sub>2</sub>O molecule in M<sup>pro</sup>-Telaprevir whose position acts as a template for the carbonyl group of the P1 lactam of 13b.
